# Supplementary material
Source: Springer Nature journal article supplement (https://www.springerprofessional.de/resource/supplementary/13173_2013_9_MOESM4_ESM.pdf/11897010)
Supplement: MOESM4 [file 11897010]

```
SELECT COUNT(DISTINCT session.session_id)
```

```
FROM session
```
